# Supplementary material for: Telomere shortening triggers a feedback loop to enhance end protection
Source: PubMed Central journal article supplement — Nucleic Acids Res. 2017 Jun 1;45(14):8314–28. doi: 10.1093/nar/gkx503 (PMC5737367; doi:10.1093/nar/gkx503), 2017-06-01
Supplement: gkx503_supp.pdf [file gkx503_supp.pdf]

## **Supplemental Information**

### **Contents**

- **Supplementary Figures S1-S14 and Figure Legends**
- **Supplementary Tables S1-S6**
- **Supplementary References**

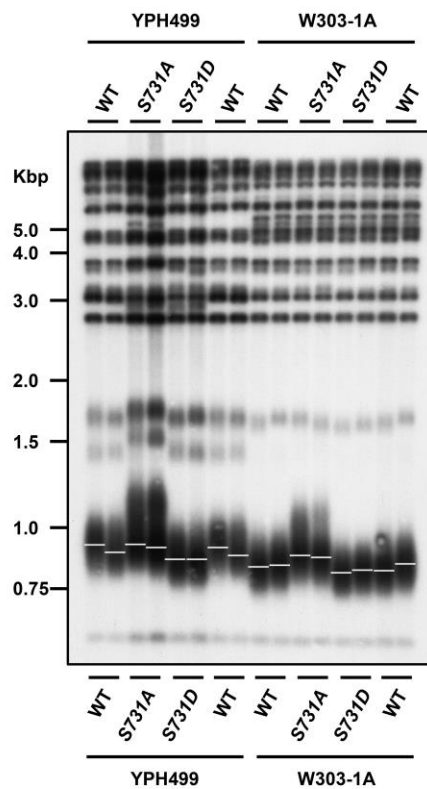

**Supplementary Figure S1. Telomere analysis of *rap1* mutants in YPH499 and W303-1A backgrounds.**

The genomic DNAs were digested with KpnI, and Southern blotting was performed as described in Figure 1B (n=2).

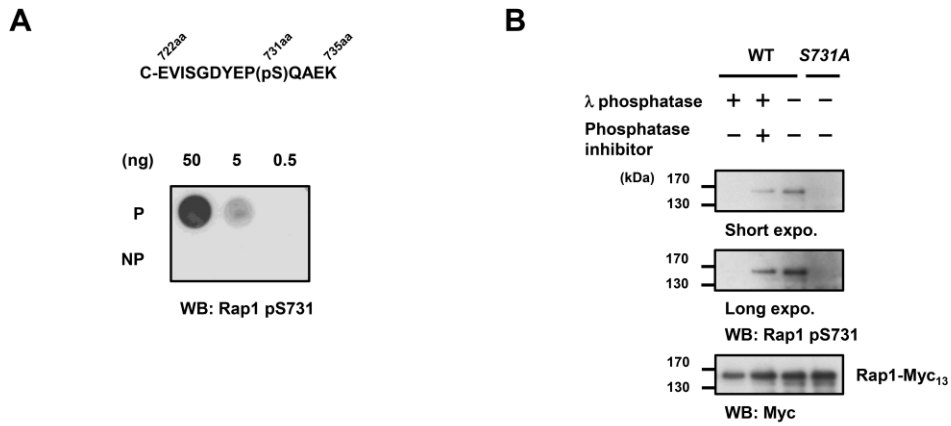

**Supplementary Figure S2. Characterization of the phospho-specific antibodies against Rap1 S731.**

**A.** Upper panel, the sequence of phosphorylated peptides, which was used to raise phospho-specific antibodies against Rap1 pS731. A cysteine residue was added to the N-terminus to facilitate conjugation with a carrier protein for greater immunogenicity. Lower panel, the peptide spotting showed the specificity of anti-Rap1 pS731 antibodies (n=2). **B.**  $\lambda$  phosphatase assay. Immunoprecipitated Rap1-Myc<sub>13</sub> proteins were treated with  $\lambda$  phosphatase and western blotting was conducted using anti-Myc and anti-Rap1 pS731 phospho-specific antibodies (n=2).

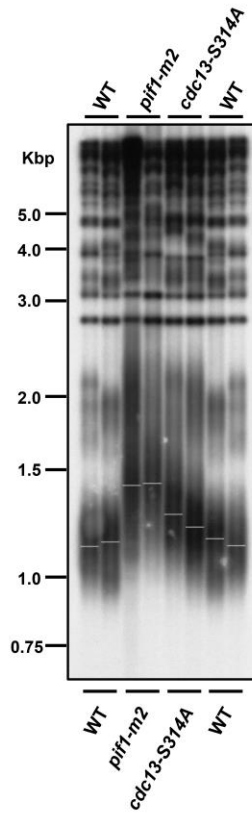

**Supplementary Figure S3. Telomere analysis of *pif1-m2* and *cdc13-S314A* mutants containing Myc<sub>13</sub>-tagged Rap1.**

The genomic DNAs were digested with KpnI, and Southern blotting was performed as described in Figure 1B (n=2).

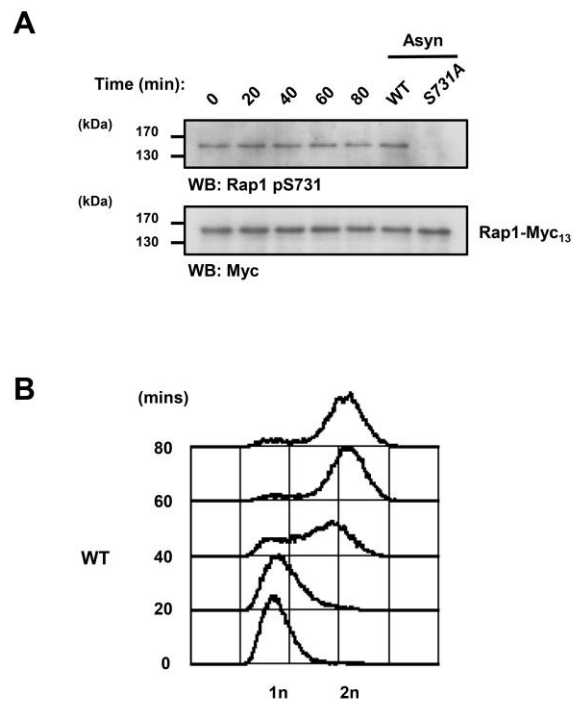

**Supplementary Figure S4. Phosphorylation of Rap1 S731 is cell cycle-independent.**

The overnight culture was refreshed to log phase in YPAD, arrested at G1 phase by  $\alpha$  factor, and released into cell cycle at 24 °C. Samples were collected at 20-min intervals. **A.** Phosphorylation of Rap1 S731 and total Rap1 amounts were analyzed by western blot analysis. Asynchronized (Asyn) WT and *rap1-S731A* cells were used as controls (n=2). **B.** Aliquots of cells were collected at 0, 20, 40, 60 and 80 minutes for FACS analysis (n=2).

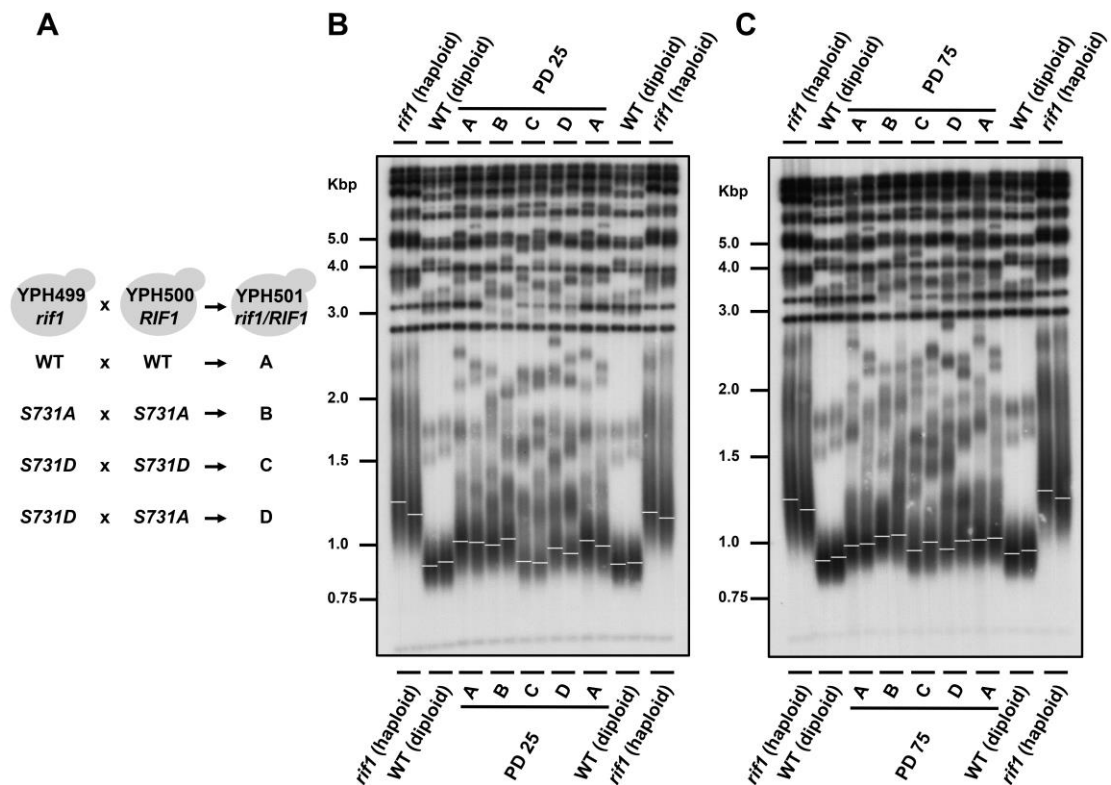

**Supplementary Figure S5. Complementation of Rif1 restored the telomeres shortening phenotype of *rap1-S731D*, while the telomeres remained elongated at the initial back-crossing stage.**

**A.** The schematic cartoon represents that the *rap1* mutants in *rif1* strains (YPH499) were back-crossed with *rap1* mutants (YPH500) to obtain different *rap1* mutant hybrids. **B.** Telomere analysis of the descendants at first 25 population doublings (PD25). The diploid hybrid cells were grown in YPAD medium for genomic DNA extraction. The genomic DNAs were digested with KpnI, and Southern blotting was performed as described in Figure 1B. *rif1* (haploid) and WT (diploid) were used as the telomere length controls (n=2). **C.** Telomere analysis of the descendants at 75 generations (PD75). The diploid hybrid cells were serially restreaked on YPAD plates for three times to reach 75 generations. The genomic DNAs were digested with KpnI, and Southern blotting was performed as described in Figure 1B (n=2).

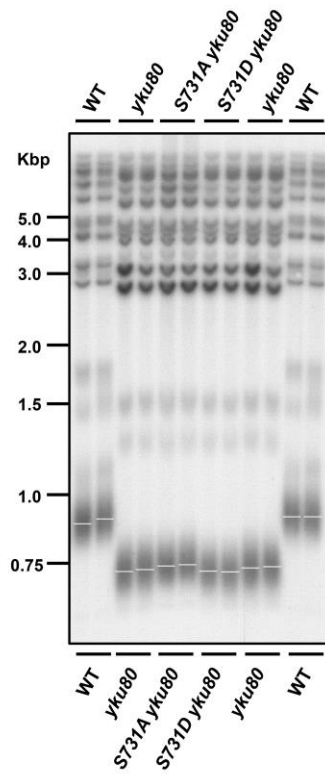

**Supplementary Figure S6. Telomere analysis of WT, *rap1-S731A*, and *rap1-S731D* in the *yku80* background.**

The genomic DNAs were digested with KpnI, and Southern blotting was performed as described in Figure 1B (n=2).

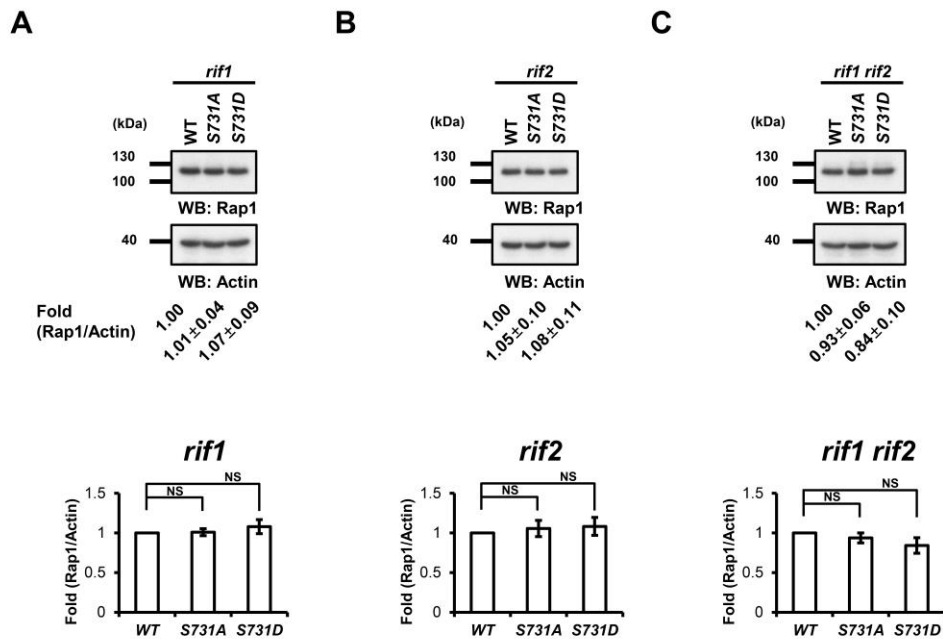

**Supplementary Figure S7. The total Rap1 amounts are comparable between WT, *rap1-S731A* and *rap1-S731D* cells in the *rif1*, *rif2* and *rif1 rif2* backgrounds.**

**A.** Total Rap1 in the *rif1* background. **B.** Total Rap1 in the *rif2* background. **C.** Total Rap1 in *rif1 rif2* background. Upper panel, cell lysates were precipitated by trichloroacetic acid (TCA) and analyzed by western blotting. Endogenous Rap1 protein was detected by polyclonal anti-Rap1 antibodies. Actin was detected by polyclonal anti-actin antibodies as a loading control. The fold of Rap1 over actin compared to that of WT is shown below. Data were expressed as the mean  $\pm$  s.d.. Lower panel, the normalized data revealed that Rap1 proteins are comparable between WT, *rap1-S731A* and *rap1-S731D* cells in the *rif1*, *rif2* and *rif1 rif2* backgrounds (n=4, NS, non-significant, Student's *t*-test, two-tailed). Bars, s.d.



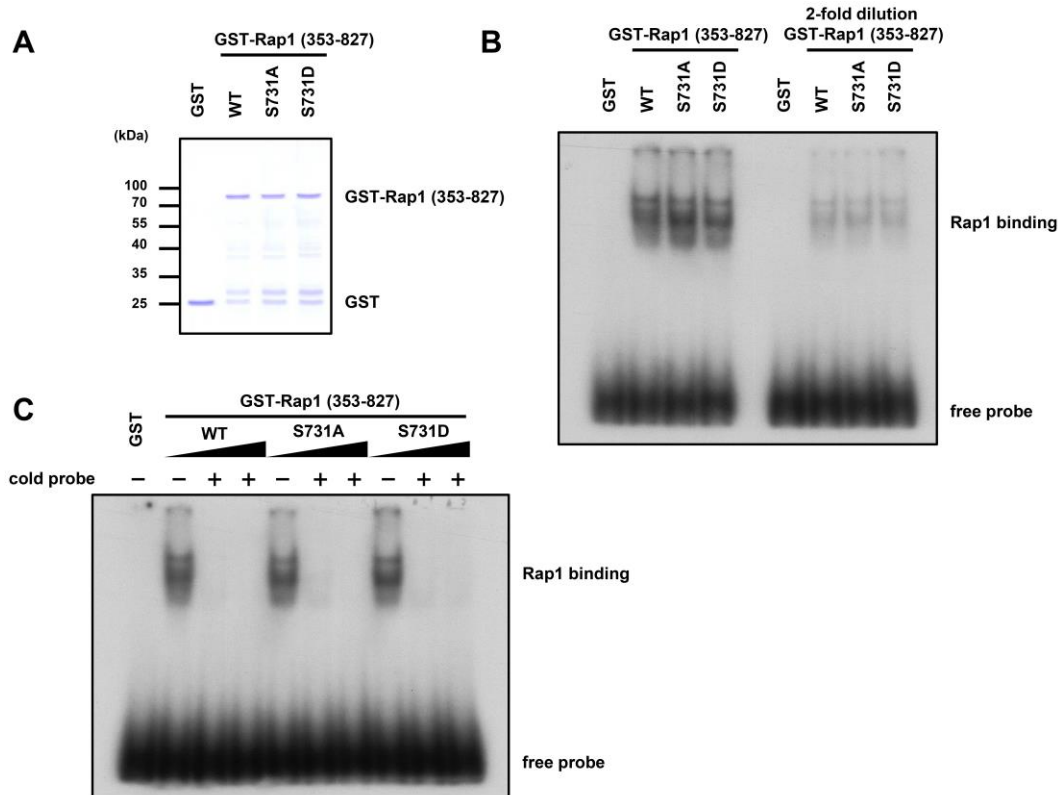

**Supplementary Figure S8. EMSA assay of Rap1 fusion proteins showed no noticeable change of the Rap1 binding affinity to telomeric DNA sequence.**

**A.** The aliquots of eluted GST and GST-Rap1(353-827) fusion proteins were resolved on a 10 % SDS-PAGE and stained with Coomassie blue as the EMSA protein loading control. **B.** Left part, the aliquots of eluted GST and GST-Rap1(353-827) fusion proteins were incubated with the  $^{32}\text{P}$ -labeled Scer19 double-stranded oligonucleotides and the reactions were resolved on a 6 % non-denaturing polyacrylamide gel for autoradiography detection. Right part, the 2-fold dilution of fusion proteins were used to perform EMSA (n=2). **C.** Non-labeled Scer19 double-stranded oligonucleotides were added in 3 and 9 times molar excess as cold probes to compete for the Rap1 fusion protein binding (n=2). The minus-labelled (–) lanes contain no cold probe.

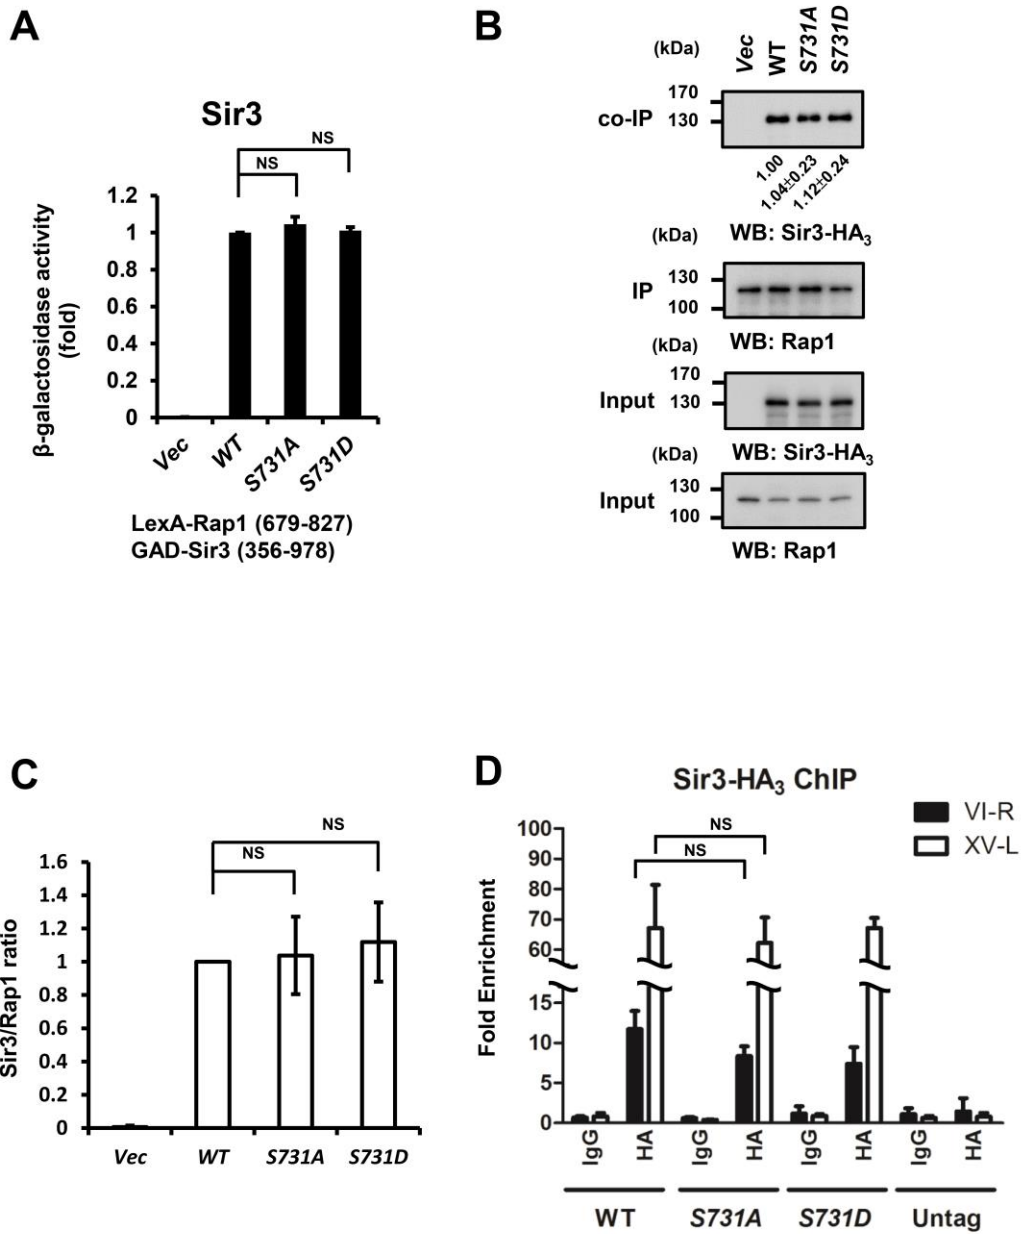

**Supplementary Figure S9. Absence of phosphorylation does not change the Rap1-Sir3 interaction.**

**A.** Yeast two-hybrid assay revealed that both *rap1-S731* mutations do not alter the Rap1-Sir3 interaction (n=4, NS, non-significant, Student's *t*-test, two-tailed). The Y axis means

the relative  $\beta$ -galactosidase activity fold. Bars, s.d. **B.** Co-IP assay demonstrated that the interaction between Rap1 and Sir3 is not changed in the absence of S731 phosphorylation. Endogenous Rap1 was immunoprecipitated from cells overexpressing Sir3-HA<sub>3</sub>. Immunoprecipitates were separated by SDS-PAGE. Western blotting was conducted using anti-Rap1 and anti-HA antibodies. WT cells carrying the empty vector were used as a negative control. **C.** Quantification data of Sir3 and Rap1 co-IP (n=4, NS, non-significant, Student's *t*-test, two-tailed). Bars, s.d. **D.** CHIP data indicated that Sir3 binding to VI-R or XV-L telomeres is not disturbed by the lack of Rap1 S731 phosphorylation (n=3, NS, non-significant, Student's *t*-test, two-tailed). Strains expressing HA-tagged proteins and an untagged strain were immunoprecipitated with anti-HA or anti-normal mouse IgG antibodies. The data were presented as in Figure 5A.

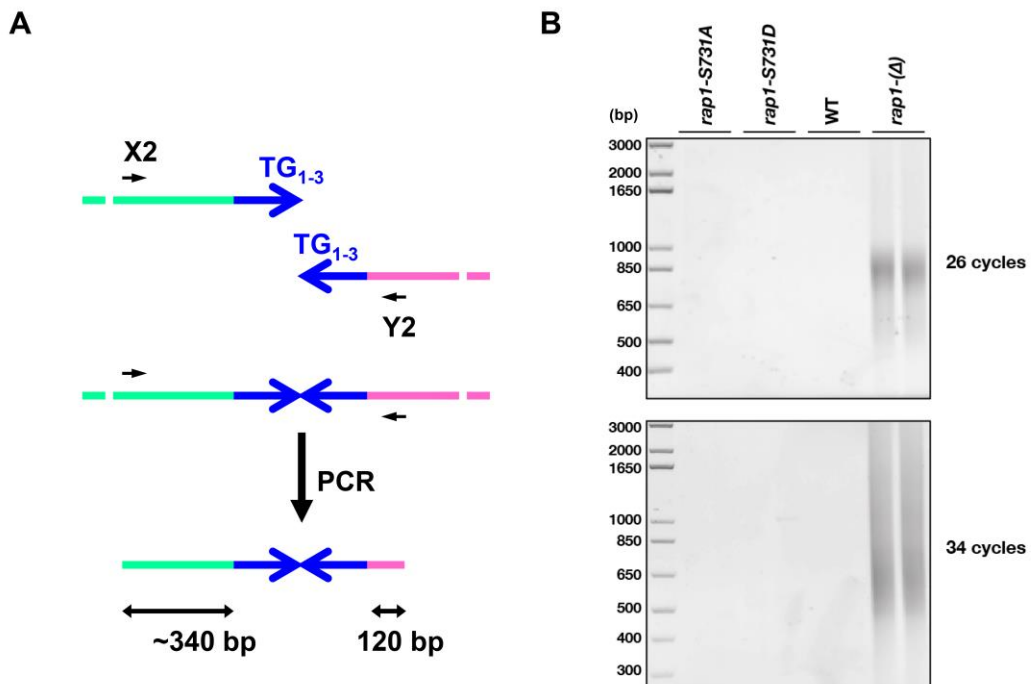

**Supplementary Figure S10. Rap1 S731 phosphorylation does not modulate telomere-telomere fusions.**

**A.** Schematic figure of the positions of the primers used for PCR amplification assay. **B.** Telomere fusions occur in neither *rap1-S731A* nor *rap1-S731D* stationary phase mutants. Two independent colonies of WT, *rap1-S731A*, *rap1-S731D* and *rap1-(Δ)* mutant cells were incubated to stationary phase (6 days) at 30 °C. The genomic DNA was extracted, and X2 and Y2 primers were used to amplify the telomere fusions by PCR. The *rap1-(Δ)* was used as a control (n=2).

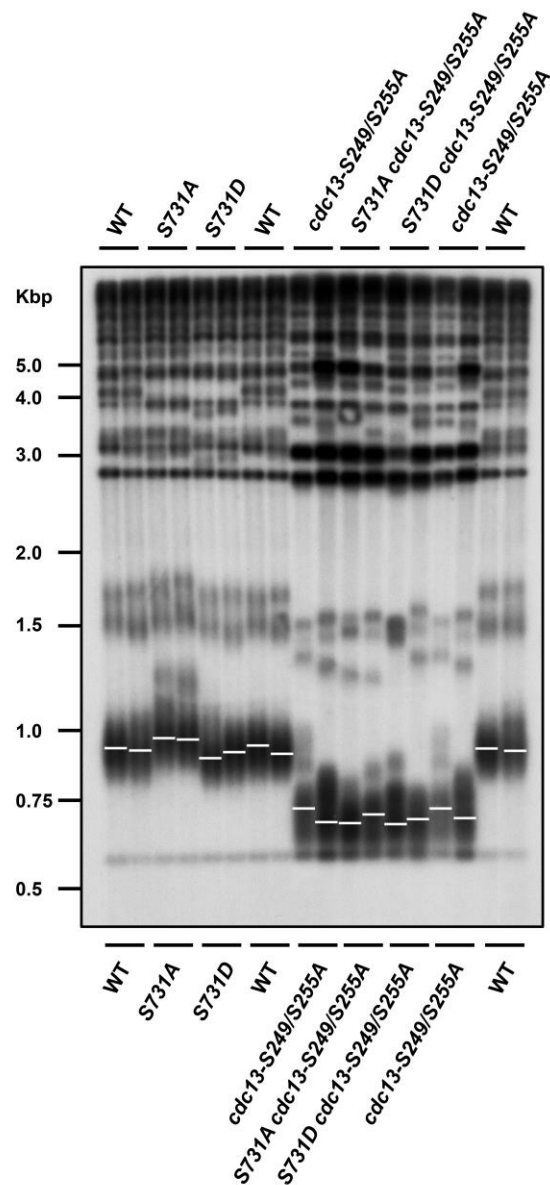

**Supplementary Figure S11. Telomere lengthening phenotype of *rap1-S731A* was abrogated in *cdc13-S249/S255A* cells.**

Telomere analysis of WT, *rap1-S731A*, and *rap1-S731D* in the *cdc13-S249/S255A* mutation background. The telomere length of each colony derived from the dissected spores was analyzed at 75 generations (PD75). The genomic DNAs were digested with KpnI, and Southern blotting was performed as described in Figure 1B (n=2).

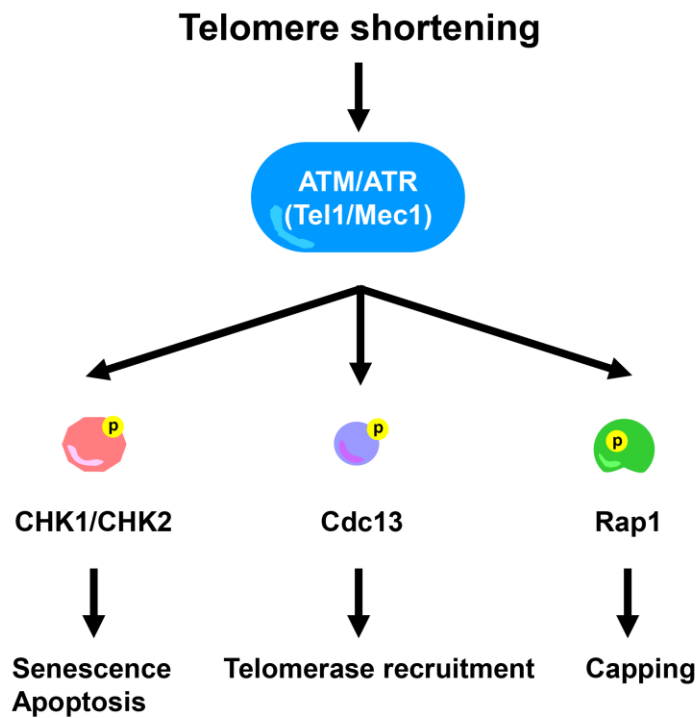

**Supplementary Figure S12. ATM/ATR kinases activate different downstream signaling pathways to circumvent progressive telomere shortening puzzle.**

In mammalian cells, progressive telomere shortening triggers ATM/ATR kinases to phosphorylate CHK1 and CHK2, activate downstream p53 signaling pathway, and finally cause cellular senescence and/or apoptosis to suppress tumorigenesis. In budding yeast, shortened telomeres induce Tel1/Mec1 to phosphorylate Cdc13 for telomerase recruitment and Rap1 for telomere capping.

**A**

Download ▾ GenBank Graphics

Saccharomyces cerevisiae strain S288c chromosome IV, complete sequence  
Sequence ID: [CP020126.1](#) Length: 1566853 Number of Matches: 1

Range 1: 714248 to 714430 [GenBank](#) [Graphics](#) ▾ Next Match ▲ Previous Match

| Score         | Expect                                                       | Identities    | Gaps      | Strand    |
|---------------|--------------------------------------------------------------|---------------|-----------|-----------|
| 339 bits(183) | 2e-89                                                        | 183/183(100%) | 0/183(0%) | Plus/Plus |
| Query 1       | TCGTTACAAGGTGATGCCAGATTTGCAAGAGATGCTTGAAACCTATGGGTTGAAAAATA  |               |           | 60        |
| Sbjct 714248  | TCGTTACAAGGTGATGCCAGATTTGCAAGAGATGCTTGAAACCTATGGGTTGAAAAATA  |               |           | 714307    |
| Query 61      | ACTCAAACGGCAACTTCAACTACTGTTTCGGGTCCTCCTGTAGGTACTTTAAAGCCATTA |               |           | 120       |
| Sbjct 714308  | ACTCAAACGGCAACTTCAACTACTGTTTCGGGTCCTCCTGTAGGTACTTTAAAGCCATTA |               |           | 714367    |
| Query 121     | AAACATGTTGATATGGAGCCAATGACTGATGCGTCTTAACTGCATGTGTTGTTGCCGCT  |               |           | 180       |
| Sbjct 714368  | AAACATGTTGATATGGAGCCAATGACTGATGCGTCTTAACTGCATGTGTTGTTGCCGCT  |               |           | 714427    |
| Query 181     | ATT 183                                                      |               |           |           |
| Sbjct 714428  | ATT 714430                                                   |               |           |           |

**B**

Download ▾ GenBank Graphics

Saccharomyces cerevisiae strain S288c chromosome VI, complete sequence  
Sequence ID: [CP020128.1](#) Length: 271539 Number of Matches: 1

Range 1: 271019 to 271188 [GenBank](#) [Graphics](#) ▾ Next Match ▲ Previous Match

| Score         | Expect                                                       | Identities    | Gaps      | Strand    |
|---------------|--------------------------------------------------------------|---------------|-----------|-----------|
| 315 bits(170) | 4e-84                                                        | 170/170(100%) | 0/170(0%) | Plus/Plus |
| Query 1       | ATCATTGAGGATCTATAATCAACTATAGACATTAATGTATGGATAATCATGAGGATTATA |               |           | 60        |
| Sbjct 271019  | ATCATTGAGGATCTATAATCAACTATAGACATTAATGTATGGATAATCATGAGGATTATA |               |           | 271078    |
| Query 61      | GGTAAATGGCAAGGGTAAAAACCAAGTGAAGCCATTTCCGTGTGTAGTATCCGAACTCAG |               |           | 120       |
| Sbjct 271079  | GGTAAATGGCAAGGGTAAAAACCAAGTGAAGCCATTTCCGTGTGTAGTATCCGAACTCAG |               |           | 271138    |
| Query 121     | TTACTATTGATGGAAATGAGGACTGGGTATGGGGCCCAATGGAGTGAAG 170        |               |           |           |
| Sbjct 271139  | TTACTATTGATGGAAATGAGGACTGGGTATGGGGCCCAATGGAGTGAAG 271188     |               |           |           |

**C**

Download ▾ GenBank Graphics Sort by: E value ▾

TPA\_inf: Saccharomyces cerevisiae S288C chromosome XV, complete sequence  
Sequence ID: [BK006948.2](#) Length: 1091291 Number of Matches: 2

Range 1: 129 to 500 [GenBank](#) [Graphics](#) ▾ Next Match ▲ Previous Match

| Score         | Expect                                                       | Identities    | Gaps      | Strand    |
|---------------|--------------------------------------------------------------|---------------|-----------|-----------|
| 688 bits(372) | 0.0                                                          | 372/372(100%) | 0/372(0%) | Plus/Plus |
| Query 1       | TAACCTGTCCAACTGTCTCAAACCTACCCTCATTACCTACCTCCCACTCGTTAC       |               |           | 60        |
| Sbjct 129     | TAACCTGTCCAACTGTCTCAAACCTACCCTCATTACCTACCTCCCACTCGTTAC       |               |           | 188       |
| Query 61      | CCTGCCCATTTAACCATACACAGCGAACACGATCCACATCTACTTCTTACCACCA      |               |           | 120       |
| Sbjct 189     | CCTGCCCATTTAACCATACACAGCGAACACGATCCACATCTACTTCTTACCACCA      |               |           | 248       |
| Query 121     | ACCACCGTCCACCATAACCGTTACCCTCCAACCTACCCATATCCTACTCCACTGCCACTT |               |           | 180       |
| Sbjct 249     | ACCACCGTCCACCATAACCGTTACCCTCCAACCTACCCATATCCTACTCCACTGCCACTT |               |           | 308       |
| Query 181     | ACCCTGCCATTCCTCTACCATCCATCATCTGCTACTACTACTGTTGTTCTACCCACC    |               |           | 240       |
| Sbjct 309     | ACCCTGCCATTCCTCTACCATCCATCATCTGCTACTACTACTGTTGTTCTACCCACC    |               |           | 368       |
| Query 241     | ATATTGAAACGCTAACAAATGATCGTAAATAACACATATACTACCTACCCTCCAA      |               |           | 300       |
| Sbjct 369     | ATATTGAAACGCTAACAAATGATCGTAAATAACACATATACTACCTACCCTCCAA      |               |           | 428       |
| Query 301     | TCCCACACCACATGCCATACTCACCTTGTATATTGATATGCCATAGCCACCGG        |               |           | 360       |
| Sbjct 429     | TCCCACACCACATGCCATACTCACCTTGTATATTGATATGCCATAGCCACCGG        |               |           | 488       |
| Query 361     | ATGCTATAGTAT 372                                             |               |           |           |
| Sbjct 489     | ATGCTATAGTAT 500                                             |               |           |           |

**Supplementary Figure S13. *In silico* specificity screens of ChIP primers.***In silico* specificity of PCRs was assessed by BLAST (NCBI) for **A.** ARO1-ChIP primers.**B.** VI-R-ChIP primers. **C.** XV-L-ChIP primers.

**A**

**Melt Analysis  
for ARO1-ChIP primer**

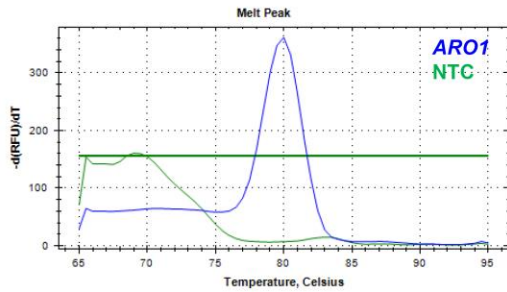

**Standard curve**

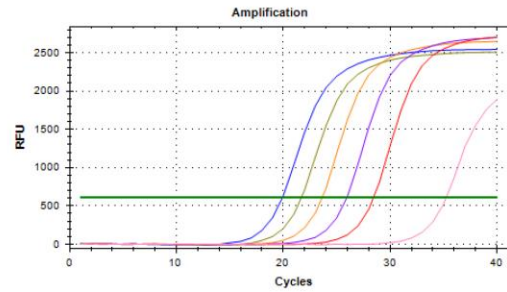

**Standard curve**

$$y = -1.537\ln(x) + 19.688$$

$$R^2 = 0.9948$$

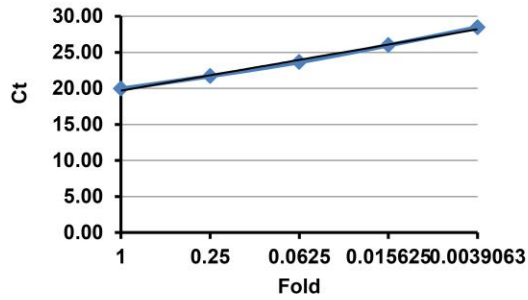

| Fold       | Ct    |
|------------|-------|
| 1          | 19.94 |
| 0.25       | 21.71 |
| 0.0625     | 23.65 |
| 0.015625   | 25.98 |
| 0.00390625 | 28.46 |
| NTC        | 35.27 |

**Raw data**

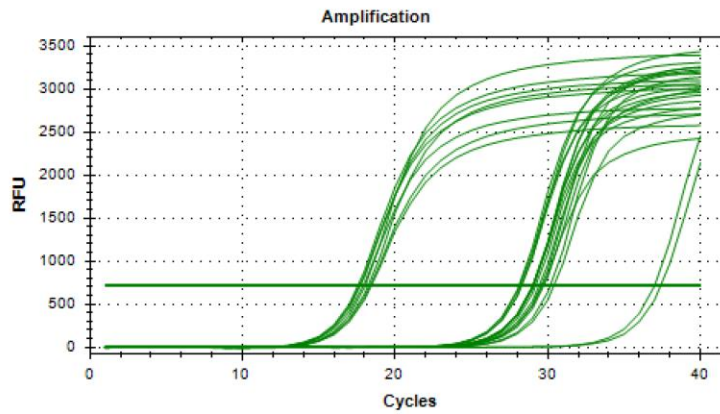



**B**

**Melt Analysis  
for VI-R-ChIP primer**

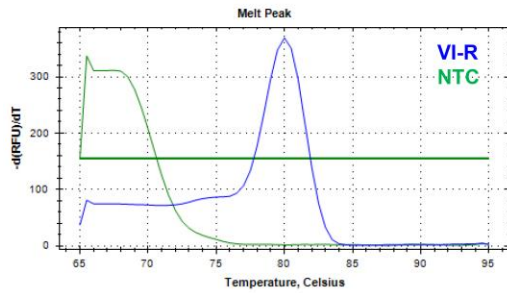

**Standard curve**

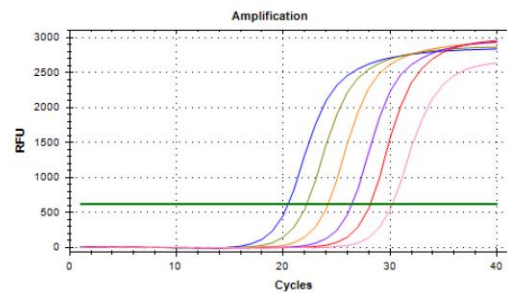

**Standard curve**

$$y = -1.417\ln(x) + 20.338$$

$$R^2 = 0.9984$$

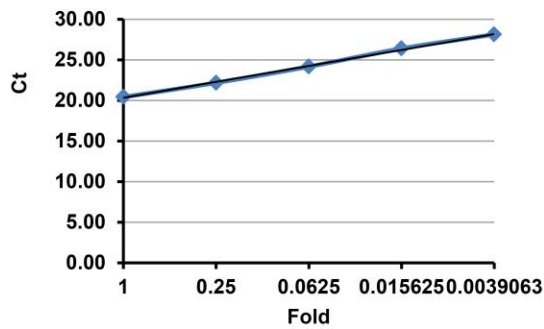

| Fold       | Ct    |
|------------|-------|
| 1          | 20.43 |
| 0.25       | 22.18 |
| 0.0625     | 24.18 |
| 0.015625   | 26.40 |
| 0.00390625 | 28.14 |
| NTC        | 30.20 |

**Raw data**

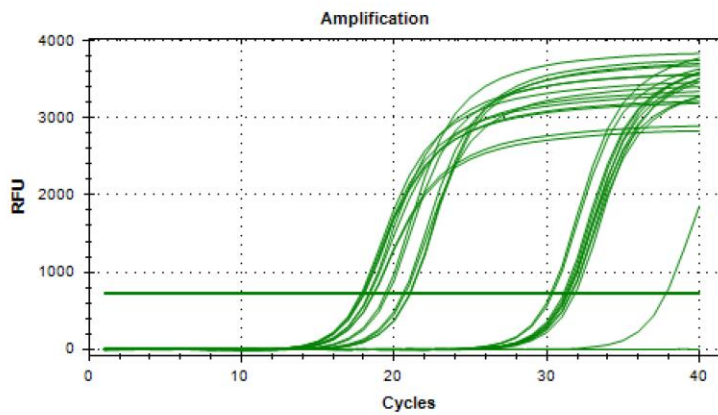

C

### Melt Analysis for XV-L-ChIP primer

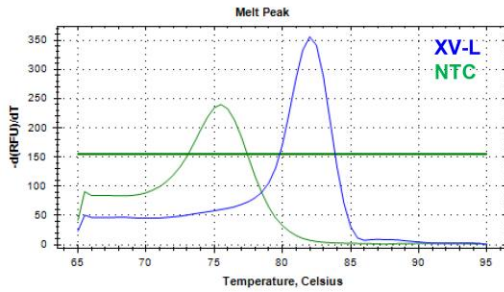

### Standard curve

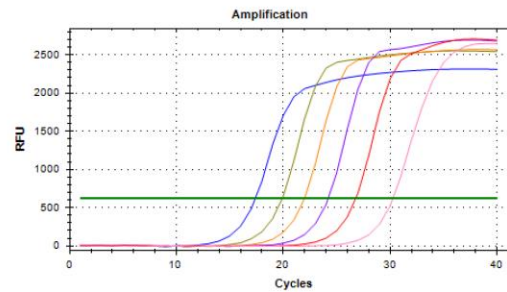

### Standard curve

$$y = -1.665\ln(x) + 17.421$$

$$R^2 = 0.9987$$

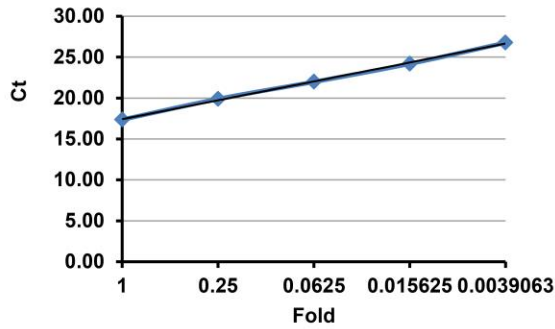

| Fold       | Ct    |
|------------|-------|
| 1          | 17.37 |
| 0.25       | 19.89 |
| 0.0625     | 21.98 |
| 0.015625   | 24.19 |
| 0.00390625 | 26.76 |
| NTC        | 30.25 |

### Raw data

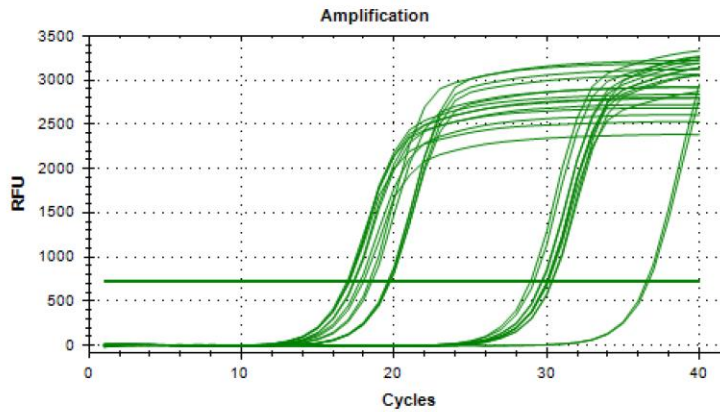

**Supplementary Figure S14. RT-qPCR assay performance in accordance with MIQE guidelines.**

Specificity of primers and the amplified PCR products were examined by melt analysis, standard curves and raw data for **A.** *ARO1*-ChIP primers, **B.** VI-R-ChIP primers, and **C.** XV-L-ChIP primers.

**Supplementary Table S1. Distribution of survivor types.**

| Genotype               | No. of survivors (% of total) |          |         |
|------------------------|-------------------------------|----------|---------|
|                        | Total studied                 | Type I   | Type II |
| <i>tlc1</i>            | 150                           | 140 (93) | 10 (7)  |
| <i>tlc1 rap1-S731A</i> | 150                           | 127 (85) | 23 (15) |
| <i>tlc1 rap1-S731D</i> | 150                           | 142 (95) | 8 (5)   |

**Supplementary Table S2. Strains Used in This Study.**

| Strain  | Genotype                                                                                                                                 | Source     |
|---------|------------------------------------------------------------------------------------------------------------------------------------------|------------|
| YPH501  | <i>MAT a/α ura3-52/ura3-52 lys2-801/lys2-801 ade2-101/ade2-101</i><br><i>trp1Δ63/trp1Δ63 his3Δ200/his3Δ200 leu2-deltaΔ1/leu2-deltaΔ1</i> | (1)        |
| YPH499  | <i>MATα ura3-52 lys2-801 ade2-101 trp1Δ63 his3Δ200 leu2-deltaΔ1</i>                                                                      | (1)        |
| YPH500  | <i>MATα ura3-52 lys2-801 ade2-101 trp1Δ63 his3Δ200 leu2-deltaΔ1</i>                                                                      | (1)        |
| STY2289 | YPH499 <i>RAP1-3HA-KanMX6</i>                                                                                                            | This study |
| CWY154  | YPH499 <i>rap1-S142A</i>                                                                                                                 | This study |
| CWY156  | YPH499 <i>rap1-S142D</i>                                                                                                                 | This study |
| CWY161  | YPH499 <i>rap1-Linker 6S/TA</i>                                                                                                          | This study |
| CWY163  | YPH499 <i>rap1-Linker 6SD/TE</i>                                                                                                         | This study |
| CWY187  | YPH499 <i>rap1-T364A</i>                                                                                                                 | This study |
| CWY188  | YPH499 <i>rap1-T364E</i>                                                                                                                 | This study |
| CWY165  | YPH499 <i>rap1-S479/T486/S594A</i>                                                                                                       | This study |
| CWY168  | YPH499 <i>rap1-S479D/T486E/S594D</i>                                                                                                     | This study |
| CWY157  | YPH499 <i>rap1-S658/S660A</i>                                                                                                            | This study |
| CWY159  | YPH499 <i>rap1-S658/S660D</i>                                                                                                            | This study |
| CWY34   | YPH499 <i>rap1-S731A</i>                                                                                                                 | This study |
| CWY40   | YPH499 <i>rap1-S731D</i>                                                                                                                 | This study |
| CWY274  | YPH499 <i>rap1-ΔC-TRP1</i>                                                                                                               | This study |
| CWY59   | YPH499 <i>RAP1-13MYC-KanMX6</i>                                                                                                          | This study |
| CWY60   | YPH499 <i>rap1-S731A-13MYC-KanMX6</i>                                                                                                    | This study |
| CWY109  | YPH499 <i>yku80::HIS3MX6</i>                                                                                                             | This study |

|        |                                                                                                       |            |
|--------|-------------------------------------------------------------------------------------------------------|------------|
| CWY111 | YPH499 <i>yku80::HIS3MX6 rap1-S731A</i>                                                               | This study |
| CWY113 | YPH499 <i>yku80::HIS3MX6 rap1-S731D</i>                                                               | This study |
| CWY221 | YPH501 <i>tlc1::LEU2/TLC1 RAP1/RAP1-13MYC-KanMX6</i> derived from STY95                               | This study |
| CWY230 | YPH499 <i>yku80::HIS3MX6 RAP1-13MYC-TRP1</i>                                                          | This study |
| CWY241 | YPH500 <i>pif1-m2 RAP1-13MYC-TRP1</i>                                                                 | This study |
| CWY239 | YPH499 <i>cdc13-S314A RAP1-13MYC-TRP1</i>                                                             | This study |
| CWY232 | YPH500 <i>tel1::HIS3MX6 RAP1-13MYC-TRP1</i>                                                           | This study |
| CWY233 | YPH499 <i>mec1::HIS3MX6 sml1::KanMX4 RAP1-13MYC-TRP1</i>                                              | This study |
| CWY235 | YPH501 <i>tel1::HIS3MX6/TEL1 mec1::HIS3MX6/MEC1 sml1::KanMX4/SML1 RAP1-13MYC-TRP1/RAP1-13MYC-TRP1</i> | This study |
| CWY237 | YPH499 <i>tel1::HIS3MX6 mec1::HIS3MX6 sml1::KanMX4 RAP1-13MYC-TRP1</i> derived from CWY235            | This study |
| CWY229 | YPH501 <i>rif1::TRP1/RIF1 rif2::HIS3/RIF2</i>                                                         | This study |
| CWY243 | YPH501 <i>rif1::TRP1/RIF1 rif2::HIS3/RIF2 rap1-S731A/RAP1</i>                                         | This study |
| CWY244 | YPH501 <i>rif1::TRP1/RIF1 rif2::HIS3/RIF2 rap1-S731D/RAP1</i>                                         | This study |
| CWY39  | YPH500 <i>rap1-S731A</i>                                                                              | This study |
| CWY44  | YPH500 <i>rap1-S731D</i>                                                                              | This study |
| CWY250 | YPH499 <i>rif1::TRP1 rap1-S731A</i>                                                                   | This study |
| CWY251 | YPH499 <i>rif1::TRP1 rap1-S731D</i>                                                                   | This study |
| ZJY259 | YPH501 <i>cdc13-S249/S255A/CDC13</i>                                                                  | (2,3)      |
| CWY213 | YPH501 <i>cdc13-S249/S255A/CDC13 rap1-S731A/RAP1</i>                                                  | This study |
| CWY215 | YPH501 <i>cdc13-S249/S255A/CDC13 rap1-S731D/RAP1</i>                                                  | This study |

|         |                                                                                                                        |            |
|---------|------------------------------------------------------------------------------------------------------------------------|------------|
| STY95   | YPH501 <i>tlc1::LEU2/TLC1</i>                                                                                          | (4)        |
| CWY1    | YPH501 <i>tlc1::LEU2/TLC1 rap1-S731A/RAP1</i>                                                                          | This study |
| CWY4    | YPH501 <i>tlc1::LEU2/TLC1 rap1-S731D/RAP1</i>                                                                          | This study |
| CWY148  | YPH500 <i>mec1::HIS3MX6 tel1::HIS3MX6 sml1::KanMX4 + pKR5</i><br>( <i>TEL1-HA</i> )                                    | This study |
| CWY150  | YPH500 <i>tel1::HIS3MX6 + pJM8 (tel1-HA(KD))</i>                                                                       | This study |
| BY4741  | <i>MATa his3Δ1 leu2Δ0 met15Δ0 ura3Δ0</i>                                                                               | (5)        |
| LSS90   | BY4741 <i>18MYC-MEC1::LEU2 5HA-tel1-KD::kanMXURA3</i><br><i>pep4::AUR1<sup>r</sup></i>                                 | (6)        |
| LSS93   | BY4741 <i>18MYC-mec1-KD::URA3 5HA-TEL1 sml1::His3MX</i><br><i>pep4::AUR1<sup>r</sup></i>                               | (6)        |
| L40     | <i>MATa his3-delta200 trp1-901 leu2-3, 112 ade2 lys2-801am</i><br><i>LYS2::(lexAop)4-HIS3URA3::(lexAop)8-lacZ GAL4</i> | Invitrogen |
| W303-1A | <i>MATa leu2-3, 112 ura3-1 trp1-1 his3-11, 15 ade2-1 can1-100</i>                                                      | (7)        |
| CWY88   | W303-1A <i>rap1-S731A</i>                                                                                              | This study |
| CWY89   | W303-1A <i>rap1-S731D</i>                                                                                              | This study |
| MS179   | W303-1A Lev220 <i>bar1::Kan RIF1-Gly<sub>8</sub>-Myc<sub>9</sub> adh4::FRT-TEL</i>                                     | (8)        |
| STY2305 | MS179 <i>rap1-S731A</i>                                                                                                | This study |
| CWY14   | MS179 <i>rap1-S731D</i>                                                                                                | This study |
| MS206   | W303-1A Lev220 <i>bar1::Kan RIF2- Gly<sub>8</sub>-Myc<sub>9</sub> adh4::FRT-TEL</i>                                    | (8)        |
| STY2307 | MS206 <i>rap1-S731A</i>                                                                                                | This study |
| CWY22   | MS206 <i>rap1-S731D</i>                                                                                                | This study |
| CWY98   | W303-1A <i>SIR3-3HA-HIS3MX6</i>                                                                                        | This study |

|         |                                                                                                                            |            |
|---------|----------------------------------------------------------------------------------------------------------------------------|------------|
| CWY99   | W303-1A <i>SIR3-3HA-HIS3MX6 rap1-S731A</i>                                                                                 | This study |
| CWY100  | W303-1A <i>SIR3-3HA-HIS3MX6 rap1-S731D</i>                                                                                 | This study |
| CWY121  | W303-1A <i>sir3::HIS3MX6</i>                                                                                               | This study |
| CWY123  | W303-1A <i>sir3::HIS3MX6 rap1-S731A</i>                                                                                    | This study |
| CWY125  | W303-1A <i>sir3::HIS3MX6 rap1-S731D</i>                                                                                    | This study |
| 210-3d  | W303-1A <i>hml-Δ::NAT</i>                                                                                                  | (9)        |
| 209-1c  | W303-1A <i>hml-Δ::NAT pACE1-UBR1 pACE1-ROX1 rap1-(Δ)::KANr</i>                                                             | (9)        |
| CWY270  | 210-3d <i>hml-Δ::NAT rap1-S731A</i>                                                                                        | This study |
| CWY272  | 210-3d <i>hml-Δ::NAT rap1-S731D</i>                                                                                        | This study |
| UCC3505 | <i>MATa ade2-101 his3-Δ200 leu2-Δ1 lys2-801 trp1Δ63 ura3-52</i><br><i>ppr1::HIS3 adh4::URA3-TEL-VIIL DIA5-1 VR-ADE-TEL</i> | (10)       |
| STY2144 | UCC3505 <i>RAP1-TRP1</i>                                                                                                   | This study |
| STY2145 | UCC3505 <i>rap1-S731A-TRP1</i>                                                                                             | This study |
| STY2146 | UCC3505 <i>rap1-S731D-TRP1</i>                                                                                             | This study |
| CWY209  | UCC3505 <i>RAP1-TRP1 sir3::KanMX6</i>                                                                                      | This study |
| CWY275  | UCC3505 <i>rap1-ΔC-TRP1</i>                                                                                                | This study |
| UCC3515 | <i>MATα ade2-101 his3-Δ200 leu2-Δ1 lys2-801 trp1Δ63 ura3-52</i><br><i>hml::URA3</i>                                        | (10)       |
| STY2147 | UCC3515 <i>RAP1-TRP1</i>                                                                                                   | This study |
| STY2148 | UCC3515 <i>rap1-S731A-TRP1</i>                                                                                             | This study |
| STY2149 | UCC3515 <i>rap1-S731D-TRP1</i>                                                                                             | This study |
| CWY210  | UCC3515 <i>RAP1-TRP1 sir3::KanMX6</i>                                                                                      | This study |
| CWY276  | UCC3515 <i>rap1-ΔC-TRP1</i>                                                                                                | This study |

|         |                                                                                                                                         |            |
|---------|-----------------------------------------------------------------------------------------------------------------------------------------|------------|
| UCC4564 | <i>MAT<math>\alpha</math> ade2-101 his3-<math>\Delta</math>200 leu2-<math>\Delta</math>1 lys2-801 trp1<math>\Delta</math>63 ura3-52</i> | (10)       |
|         | <i>ppr1::LYS2 hmr::URA3</i>                                                                                                             |            |
| STY2150 | UCC4564 <i>RAP1-TRP1</i>                                                                                                                | This study |
| STY2151 | UCC4564 <i>rap1-S731A-TRP1</i>                                                                                                          | This study |
| STY2152 | UCC4564 <i>rap1-S731D-TRP1</i>                                                                                                          | This study |
| CWY211  | UCC4564 <i>RAP1-TRP1 sir3::KanMX6</i>                                                                                                   | This study |
| CWY277  | UCC4564 <i>rap1-<math>\Delta</math>C-TRP1</i>                                                                                           | This study |

---



**Supplementary Table S3. Constructs Used in This Study.**

| Name                               | Source     |
|------------------------------------|------------|
| pRS306 <i>RAP1</i>                 | This study |
| pRS304 <i>RAP1</i>                 | This study |
| pRS304-Rap1- $\Delta$ C(672-827)   | This study |
| pGEX-4T-Rif1(1709-1916)            | This study |
| pGEX-4T-Rif2(1-395)                | This study |
| pGEX-4T-Rap1(353-827)              | This study |
| pGEX-4T-Rap1(716-746)              | This study |
| pKR5 ( <i>TEL1-HA</i> )            | (11)       |
| pJM8 ( <i>tel1-HA(KD)</i> )        | (11)       |
| YE <p>FAT7-SIR3-HA<sub>3</sub></p> | This study |
| pBTM116-Rap1(679-827)              | (12)       |
| pACT2-Rif1(1614-1916)              | (12)       |
| pACT2-Rif2(14-395)                 | (12)       |
| pACT2-Sir3(356-975)                | (12)       |

**Supplementary Table S4. Primers Used in This Study.**

| Primer                  | Sequence                                       |
|-------------------------|------------------------------------------------|
|                         | Site-direct mutagenesis                        |
| <i>rap1-S142A</i>       | GCGACGCGGATGCGCATGACGCGTTAAATGATATTGATCAATTAG  |
| <i>rap1-S142D</i>       | GCGACGCGGATGCCCATGACGACTTAAATGATATTGATCAATTAG  |
| <i>rap1-S237A</i>       | GATAATAGCAATTCGAATGCCGATAACAAGGATTCTATCAGGCC   |
| <i>rap1-S237D</i>       | GATAATAGCAATTCGAATGATGATAACAAGGATTCTATCAGGCC   |
| <i>rap1-S261/T262A</i>  | TGGCGCTACGGAAGACGCAGCTAGCGAAAAAGTTATGGTAGACGC  |
| <i>rap1-S261D/T262E</i> | TGGCGCCACGGAAGACGACGAGAGCGAAAAAGTTATGGTAGACGC  |
| <i>rap1-S288/S289A</i>  | CAGCTCCTTCGTCAACACGTGGCCGCCACCGCATCAATCACAAGC  |
| <i>rap1-S288/S289D</i>  | CAGCTCCTTCGTCAACATGTGACGACACCGCATCAATCACAAGC   |
| <i>rap1-S342A</i>       | ACAGCAGATGAGGGGAATGCAGCTTTTCAAGCACAAAGGTCCATG  |
| <i>rap1-S342D</i>       | ACAGCAGATGAGGGGAATGCAGACTTTTCAAGCACAAAGGTCCATG |
| <i>rap1-T364E</i>       | TTGCCCTCCCACAATAAAGCTTCTTTTGAAGATGAGGAAGATGAG  |
| <i>rap1-T364A</i>       | TTGCCCTCCCACAATAAAGCATCTTTTGCAGATGAGGAAGATGAG  |
| <i>rap1-S479/T486A</i>  | CTGGAAGAGCGCTTATCACAGATGAGGATGCACCCACTGCTATAG  |
| <i>rap1-S479D/T486E</i> | CTGGAAGAGATCTTATCACAGATGAGGATGACCCACTGCTATAG   |
| <i>rap1-S594A</i>       | CCCACTCCTGGCAATTATAACGCGGCCGCCAAGAGGGCAAGAAAT  |
| <i>rap1-S594D</i>       | CCCACTCCTGGCAATTACAACGACGCCGCCAAGAGGGCAAGAAAT  |
| <i>rap1-S658/S660A</i>  | CTATCCAATATTGCAAATGCATTGCCCTTTGAGTATCCACACGAG  |
| <i>rap1-S658/S660D</i>  | CTATCCAATATCGATAATGACTTGCCCTTTGAGTATCCACACGAG  |
| <i>rap1-S731A</i>       | GAGATTATGAGCCGGCACAGGCTGAAAACTGGTACAG          |
| <i>rap1-S731D</i>       | ATTCAGGAGATTATGAGCCTGATCAGGCTGAAAACTGGTACAG    |

*rap1-ΔC* construct

---

*RAP1-del2014-2481* GAGTATCCACACGAGATTGCGGAATGAGTAATTGAATTAAGTAACA

*RAP1-del2014-2481* TGTTACTTAATTCAATTACTCATTCCGCAATCTCGTGTGGATACTC

*antisense*

---

pGEX-4T-Rap1 construct

*RAP1-F-716-BamHI* GGATCCTTTATGGATAAACTTCATGAAG

*RAP1-R-746-XhoI* CTCGAGTATAACAGTTTCATCGCAAAG

*RAP1-F-353-EcoRI* TCCCCGGAATTCGGCGCTTTGCCCTCCCACAATAAAG

*RAP1-R-827-XhoI* AGCTTCTCGAGTCATAACAGGTCCTTCTC

---

pGEX-4T-Rif1 (1709-1916)

*RIF1-F-1709-EcoRI* CCCCCGGAATTCGGAGATAAGGATGCCAATAT

*RIF1-R-1916-XhoI* AGCTTCTCGAGATTCATATCATTATCCCTGTTTG

---

pGEX-4T-Rif2 (1-395)

*RIF2-F-1-EcoRI* CTCCCGAATTCATGGAGCATGTAGATTCCG

*RIF2-R-395-XhoI* AGCTTCTCGAGTCTATCATGTACTTTTCGAG

---

Rap1-HA<sub>3</sub> and Rap1-Myc<sub>13</sub> tagging

*RAP1-cF2* GGTAGAATGGAAATGAGGAAAAGATTTTTTGGAGAAGGACCTGTTAC

GGATCCCCGGGTTA

*RAP1-cR1* AAGGAGTAAAATAAGTTAAACAATGATGTTACTTAATTCAATTACGA

ATTCGAGCTCGTT

---

Sir3-HA<sub>3</sub> and *sir3::HIS3MX6* construct

*SIR3-3HA-F* TACGCCTTTTCGATGGATGAAGAATTCAAAAATATGGACTGCATTCCG

|                      |                                                                        |
|----------------------|------------------------------------------------------------------------|
|                      | GATCCCCGGGTTAATTAA                                                     |
| <i>SIR3-3HA-R</i>    | GTACATAGGCATATCTATGGCGGAAGTGAAAATGAATGTTGGTGGG<br>AATTCGAGCTCGTTTAAAC  |
| <i>SIR3-del-F1-F</i> | GGGGTTTAAGAAAGTTGTTTTGTTCTAACAATTGGATTAGCTAAACG<br>GATCCCCGGGTTAATTAA  |
| <hr/>                |                                                                        |
|                      | YE <i>pFAT7-SIR3-HA<sub>3</sub></i> construct                          |
| <i>SIR3-pro-F</i>    | GTACAATGTTCTTGGCGAAG                                                   |
| <i>SIR3-ter-R</i>    | ACGTCAAGACTGTCAAGGAG                                                   |
| <hr/>                |                                                                        |
|                      | <i>yku80::HIS3MX6</i> construct                                        |
| <i>yKU80-del-F</i>   | ATGTCAAGTGAGTCAACAACCTTTCATCGTGGATGTTTCACCATCAC<br>GGATCCCCGGGTTAATTAA |
| <i>yKU80-del-R</i>   | ATTATTGCTATTGTTTGGACTTCCCCTACTGTGTTGTTACCGCGGA<br>ATTCGAGCTCGTTTAAAC   |
| <hr/>                |                                                                        |
|                      | ChIP                                                                   |
| <i>ARO1-ChIP-F</i>   | TCGTTACAAGGTGATG                                                       |
| <i>ARO1-ChIP-R</i>   | AATAGCGGCAACAAC                                                        |
| <i>VI-R-ChIP-F</i>   | ATCATTGAGGATCTATAATC                                                   |
| <i>VI-R-ChIP-R</i>   | CTTCACTCCATTGCG                                                        |
| <i>XV-L-ChIP-F</i>   | TAACCCTGTCCAACCTGTCT                                                   |
| <i>XV-L-ChIP-R</i>   | ATACTATAGCATCCGTGGGC                                                   |
| <hr/>                |                                                                        |
|                      | NHEJ                                                                   |
| X2                   | TGTGGTGGTGGGATTAGAGTGGTAG                                              |
| Y2                   | TTAGGGCTATGTAGAAGTGCTG                                                 |

---

EMSA

|            |                     |
|------------|---------------------|
| Scer19     | TGTGGTGTGTGGGTGTGTG |
| Scer19-Rev | CACACACCCACACACCACA |

---

**Supplementary Table S5. MIQE Guidelines Checklist.**

| ITEM TO CHECK                                                        | IMPORTANCE | CHECKLIST | COMMENTS/<br>WHERE?   |
|----------------------------------------------------------------------|------------|-----------|-----------------------|
| <b>EXPERIMENTAL DESIGN</b>                                           |            |           |                       |
| Definition of experimental and control groups                        | E          | YES       | Materials and Methods |
| Number within each group                                             | E          | YES       | Materials and Methods |
| Assay carried out by core lab or investigator's lab?                 | D          | YES       | Investigator's Lab    |
| Acknowledgement of authors' contributions                            | D          | N/A       |                       |
| <b>SAMPLE</b>                                                        |            |           |                       |
| Description                                                          | E          | YES       | Materials and Methods |
| Volume/mass of sample processed                                      | D          | YES       | Materials and Methods |
| Microdissection or macrodissection                                   | E          | N/A       |                       |
| Processing procedure                                                 | E          | YES       | Materials and Methods |
| If frozen - how and how quickly?                                     | E          | N/A       |                       |
| If fixed - with what, how quickly?                                   | E          | YES       | Materials and Methods |
| Sample storage conditions and duration (especially for FFPE samples) | E          | N/A       |                       |
| <b>NUCLEIC ACID EXTRACTION</b>                                       |            |           |                       |
| Procedure and/or instrumentation                                     | E          | N/A       |                       |
| Name of kit and details of any modifications                         | E          | N/A       |                       |
| Source of additional reagents used                                   | D          | N/A       |                       |
| Details of DNase or RNase treatment                                  | E          | N/A       |                       |
| Contamination assessment (DNA or RNA)                                | E          | N/A       |                       |

|                                                   |   |     |                                                                         |
|---------------------------------------------------|---|-----|-------------------------------------------------------------------------|
| Nucleic acid quantification                       | E | N/A |                                                                         |
| Instrument and method                             | E | N/A |                                                                         |
| Purity (A260/A280)                                | D | N/A |                                                                         |
| Yield                                             | D | N/A |                                                                         |
| RNA integrity method/instrument                   | E | N/A |                                                                         |
| RIN/RQI or Cq of 3' and 5' transcripts            | E | N/A |                                                                         |
| Electrophoresis traces                            | D | N/A |                                                                         |
| Inhibition testing (Cq dilutions, spike or other) | E | N/A |                                                                         |
| <b>REVERSE TRANSCRIPTION</b>                      |   |     |                                                                         |
| Complete reaction conditions                      | E | N/A |                                                                         |
| Amount of RNA and reaction volume                 | E | N/A |                                                                         |
| Priming oligonucleotide and concentration         | E | N/A |                                                                         |
| Reverse transcriptase and concentration           | E | N/A |                                                                         |
| Temperature and time                              | E | N/A |                                                                         |
| Manufacturer of reagents and catalogue numbers    | D | N/A |                                                                         |
| Cqs with and without RT                           | D | N/A |                                                                         |
| Storage conditions of cDNA                        | D | N/A |                                                                         |
| <b>qPCR TARGET INFORMATION</b>                    |   |     |                                                                         |
| If multiplex, efficiency and LOD of each assay    | E | N/A |                                                                         |
| Sequence accession number                         | E | YES | ARO1:<br>NC_001136.10<br>ChXV-L:<br>CP020137.1<br>ChVI-R:<br>CP020128.1 |
| Location of amplicon                              | D | YES | Supplementary<br>Figure S13.                                            |
| Amplicon length                                   | E | YES | Supplementary<br>Figure S13.                                            |

|                                                           |   |     |                           |
|-----------------------------------------------------------|---|-----|---------------------------|
| <i>In silico</i> specificity screen (BLAST, etc)          | E | YES | Supplementary Figure S13. |
| Pseudogenes, retropseudogenes or other homologs?          | D | N/A |                           |
| Sequence alignment                                        | D | N/A |                           |
| Secondary structure analysis of amplicon                  | D | N/A |                           |
| Location of each primer by exon or intron (if applicable) | E | N/A |                           |
| What splice variants are targeted?                        | E | NO  |                           |
| <b>qPCR OLIGONUCLEOTIDES</b>                              |   |     |                           |
| Primer sequences                                          | E | YES | Supplementary Table S4.   |
| RTPrimerDB Identification Number                          | D | N/A |                           |
| Probe sequences                                           | D | N/A |                           |
| Location and identity of any modifications                | E | N/A |                           |
| Manufacturer of oligonucleotides                          | D | YES | MDBio, Inc                |
| Purification method                                       | D | YES | RPC                       |
| <b>qPCR PROTOCOL</b>                                      |   |     |                           |
| Complete reaction conditions                              | E | YES | Materials and Methods     |
| Reaction volume and amount of cDNA/DNA                    | E | YES | Supplementary Table S6.   |
| Primer, (probe), Mg <sup>++</sup> and dNTP concentrations | E | YES | Supplementary Table S6.   |
| Polymerase identity and concentration                     | E | YES | KAPA SYBR® FAST qPCR Kits |
| Buffer/kit identity and manufacturer                      | E | YES | KAPA SYBR® FAST qPCR Kits |
| Exact chemical constitution of the buffer                 | D | NO  | Manufactures proprietary  |
| Additives (SYBR Green I, DMSO, etc.)                      | E | YES | Materials and Methods     |



|                                                          |   |     |                                            |
|----------------------------------------------------------|---|-----|--------------------------------------------|
| Manufacturer of plates/tubes and catalog number          | D | YES | Supplementary Table S6.                    |
| Complete thermocycling parameters                        | E | YES | Materials and Methods                      |
| Reaction setup (manual/robotic)                          | D | YES | Manual setup                               |
| Manufacturer of qPCR instrument                          | E | YES | Materials and Methods                      |
| <b>qPCR VALIDATION</b>                                   |   |     |                                            |
| Evidence of optimization (from gradients)                | D | N/A |                                            |
| Specificity (gel, sequence, melt, or digest)             | E | YES | Melt analysis<br>Supplementary Figure S14. |
| For SYBR Green I, Cq of the NTC                          | E | YES | Supplementary Figure S14.                  |
| Standard curves with slope and y-intercept               | E | YES | Supplementary Figure S14.                  |
| PCR efficiency calculated from slope                     | E | N/A |                                            |
| Confidence interval for PCR efficiency or standard error | D | N/A |                                            |
| r <sup>2</sup> of standard curve                         | E | YES | Supplementary Figure S14.                  |
| Linear dynamic range                                     | E | YES | Supplementary Figure S14.                  |
| Cq variation at lower limit                              | E | N/A |                                            |
| Confidence intervals throughout range                    | D | N/A |                                            |
| Evidence for limit of detection                          | E | NO  |                                            |
| If multiplex, efficiency and LOD of each assay           | E | N/A |                                            |
| <b>DATA ANALYSIS</b>                                     |   |     |                                            |
| qPCR analysis program (source, version)                  | E | YES | Materials and Methods                      |
| Cq method determination                                  | E | YES | Materials and                              |

|                                                       |   |     |                                  |
|-------------------------------------------------------|---|-----|----------------------------------|
|                                                       |   |     | Methods                          |
| Outlier identification and disposition                | E | N/A |                                  |
| Results of NTCs                                       | E | YES | Supplementary Figure S14.        |
| Justification of number and choice of reference genes | E | YES | Materials and Methods            |
| Description of normalization method                   | E | YES | Materials and Methods            |
| Number and concordance of biological replicates       | D | YES | Materials and Methods            |
| Number and stage (RT or qPCR) of technical replicates | E | YES | Materials and Methods            |
| Repeatability (intra-assay variation)                 | E | YES | Materials and Methods            |
| Reproducibility (inter-assay variation, %CV)          | D | NO  |                                  |
| Power analysis                                        | D | NO  |                                  |
| Statistical methods for result significance           | E | YES | Biological replicates            |
| Software (source, version)                            | E | YES | Bio-Rad CFX Manager, version 3.1 |
| Cq or raw data submission using RDML                  | D | N/A |                                  |

**Supplementary Table S6. Reaction Conditions for qPCR.**

| Components                                                                        | Amount |
|-----------------------------------------------------------------------------------|--------|
| 2x KAPA SYBR® FAST qPCR Master Mix (KAPA BIOSYSTEMS)                              | 10 µL  |
| Forward Primer (10 µM)                                                            | 0.4 µL |
| Reverse Primer (10 µM)                                                            | 0.4 µL |
| Template DNA                                                                      | 2 µL   |
| PCR Grade water                                                                   | 7.2 µL |
| Total volume                                                                      | 20 µL  |
| PCR tubes (96 x 0.1 mL plate, LP, LF, NON Sk, BIOplastics catalog number B50601). |        |

## Supplementary References

1. Sikorski, R.S. and Hieter, P. (1989) A system of shuttle vectors and yeast host strains designed for efficient manipulation of DNA in *Saccharomyces cerevisiae*. *Genetics*, **122**, 19-27.
2. Shen, Z.J., Hsu, P.H., Su, Y.T., Yang, C.W., Kao, L., Tseng, S.F., Tsai, M.D. and Teng, S.C. (2014) PP2A and Aurora differentially modify Cdc13 to promote telomerase release from telomeres at G2/M phase. *Nat Commun*, **5**, 5312.
3. Shen, Z.J., Hsu, P.H., Su, Y.T., Yang, C.W., Kao, L., Tseng, S.F., Tsai, M.D. and Teng, S.C. (2015) Corrigendum: PP2A and Aurora differentially modify Cdc13 to promote telomerase release from telomeres at G2/M phase. *Nat Commun*, **6**, 7819.
4. Tsai, Y.L., Tseng, S.F., Chang, S.H., Lin, C.C. and Teng, S.C. (2002) Involvement of replicative polymerases, Tel1p, Mec1p, Cdc13p, and the Ku complex in telomere-telomere recombination. *Mol Cell Biol*, **22**, 5679-5687.
5. Brachmann, C.B., Davies, A., Cost, G.J., Caputo, E., Li, J., Hieter, P. and Boeke, J.D. (1998) Designer deletion strains derived from *Saccharomyces cerevisiae* S288C: a useful set of strains and plasmids for PCR-mediated gene disruption and other applications. *Yeast*, **14**, 115-132.
6. Takata, H., Kanoh, Y., Gunge, N., Shirahige, K. and Matsuura, A. (2004) Reciprocal association of the budding yeast ATM-related proteins Tel1 and Mec1 with telomeres in vivo. *Mol Cell*, **14**, 515-522.
7. Wallis, J.W., Chrebet, G., Brodsky, G., Rolfe, M. and Rothstein, R. (1989) A hyper-recombination mutation in *S. cerevisiae* identifies a novel eukaryotic topoisomerase. *Cell*, **58**, 409-419.
8. Sabourin, M., Tuzon, C.T. and Zakian, V.A. (2007) Telomerase and Tel1p preferentially associate with short telomeres in *S. cerevisiae*. *Mol Cell*, **27**, 550-561.
9. Lescasse, R., Pobiega, S., Callebaut, I. and Marcand, S. (2013) End-joining inhibition at telomeres requires the translocase and polySUMO-dependent ubiquitin ligase Uls1. *EMBO J*, **32**, 805-815.
10. Singer, M.S., Kahana, A., Wolf, A.J., Meisinger, L.L., Peterson, S.E., Goggin, C., Mahowald, M. and Gottschling, D.E. (1998) Identification of high-copy disruptors of telomeric silencing in *Saccharomyces cerevisiae*. *Genetics*, **150**, 613-632.
11. Mallory, J.C., Bashkurov, V.I., Trujillo, K.M., Solinger, J.A., Dominska, M., Sung, P., Heyer, W.D. and Petes, T.D. (2003) Amino acid changes in Xrs2p, Dun1p, and Rfa2p that remove the preferred targets of the ATM family of protein kinases do not affect

DNA repair or telomere length in *Saccharomyces cerevisiae*. *DNA Repair (Amst)*, **2**, 1041-1064.

12. Feeser, E.A. and Wolberger, C. (2008) Structural and functional studies of the Rap1 C-terminus reveal novel separation-of-function mutants. *J Mol Biol*, **380**, 520-531.
